# Supplementary material
Source: PubMed Central journal article supplement (PMC3013584)
Supplement: supp_WNL.0b013e3182020123_table_e-1.pdf [file supp_WNL.0b013e3182020123_table_e-1.pdf]

Supplemental data table e-1

| Characteristic                                     | Controls       | PreHD-Group      | HD-Group           | Combined         | PreHD-A            | PreHD-B          | HD1                | HD2              |
|----------------------------------------------------|----------------|------------------|--------------------|------------------|--------------------|------------------|--------------------|------------------|
| <b>Age [years]</b>                                 |                |                  |                    |                  |                    |                  |                    |                  |
| mean (SD)                                          | 46.1 (10.2)    | 40.8 (8.9)       | 48.8 (9.9)         | 44.9 (10.2)      | 41.1 (8.6)         | 40.6 (9.2)       | 47.2 (10.3)        | 51.4 (8.6)       |
| (range)                                            | (23.0 to 65.7) | (18.6 to 64.1)   | (22.8 to 64.1)     | ( 18.6 to 64.1)  | (18.6 to 59.4)     | (22.3 to 64.1)   | (22.8 to 64.1)     | (33.3 to 63.3)   |
| <b>Gender</b>                                      |                |                  |                    |                  |                    |                  |                    |                  |
| Female N [%]                                       | 68 (55.3)      | 66 (55.0)        | 67 (54.5)          | 133 (54.7)       | 33 (53.2)          | 33 (56.9)        | 46 (59.7)          | 21 (45.7)        |
| Male N [%]                                         | 55 (44.7)      | 54 (45.0)        | 56 (45.5)          | 110 (45.3)       | 29 (46.8)          | 25 (43.1)        | 31 (40.3)          | 25 (54.3)        |
| <b>Education [years]</b>                           |                |                  |                    |                  |                    |                  |                    |                  |
| mean (SD)                                          | 4 (1.3)        | 3.9 (1.2)        | 3.6 (1.3)          | 3.8 (1.3)        | 4.1 (1.1)          | 3.8 (1.3)        | 3.8 (1.3)          | 3.2 (1.4)        |
| (range)                                            | (1 to 6)       | (2 to 6)         | (1 to 6)           | ( 1 to 6)        | (2 to 6)           | (2 to 6)         | (1 to 6)           | (1 to 6)         |
| <b>Disease Burden Score<sup>1</sup></b>            |                |                  |                    |                  |                    |                  |                    |                  |
| mean (SD)                                          | n/a            | 294.8 (47.7)     | 376.6 (73.3)       | 336.2 (74.2)     | 259.1 (30.1)       | 333.1 (30.0)     | 364.1 (74.3)       | 397.6 (67.5)     |
| (range)                                            | n/a            | (171** to 408.9) | (156.2** to 566.5) | (156.2 to 566.5) | (171.0** to 308.2) | (267.6 to 408.9) | (156.2** to 566.5) | (234.3 to 548.7) |
| <b>UHDRS - Total Motor Score</b>                   |                |                  |                    |                  |                    |                  |                    |                  |
| mean (SD)                                          | 1.5 (1.7)      | 2.5 (1.6)        | 23.7 (10.8)        | 13.2 (13.1)      | 2.2 (1.4)          | 2.8 (1.8)        | 19.6 (9.2)         | 30.6 (9.7)       |
| (range)                                            | (0 to 7)       | (0 to 8*)        | (5 to 52)          | (0 to 52)        | (0 to 5)           | (0 to 8*)        | (5 to 44)          | (12 to 52)       |
| <b>UHDRS - fingertips non-dominant hand</b>        |                |                  |                    |                  |                    |                  |                    |                  |
| mean (SD)                                          | 0.07 (0.3)     | 0.3 (0.5)        | 1.3 (0.7)          | 0.8 (0.8)        | 0.18 (0.4)         | 0.38 (0.6)       | 1.1 (0.7)          | 1.5 (0.7)        |
| (range)                                            | (0 to 1)       | (0 to 2)         | (0 to 3)           | (0 to 3)         | (0 to 1)           | (0 to 2)         | (0 to 3)           | (1 to 3)         |
| <b>UHDRS - fingertips dominant hand</b>            |                |                  |                    |                  |                    |                  |                    |                  |
| mean (SD)                                          | 0.04 (0.2)     | 0.2 (0.4)        | 1.2 (0.7)          | 0.7 (0.8)        | 0.1 (0.3)          | 0.2 (0.5)        | 1.1 (0.7)          | 1.3 (0.7)        |
| (range)                                            | (0 to 1)       | (0 to 2)         | (0 to 3)           | (0 to 3)         | (0 to 1)           | (0 to 2)         | (0 to 3)           | (0 to 3)         |
| <b>Participants</b>                                |                |                  |                    |                  |                    |                  |                    |                  |
| all centres [N]                                    | 123            | 120              | 123                | 243              | 62                 | 58               | 77                 | 46               |
| Leiden [N]                                         | 30             | 30               | 30                 | 60               | 16                 | 14               | 16                 | 14               |
| London [N]                                         | 30             | 30               | 30                 | 60               | 14                 | 16               | 19                 | 11               |
| Paris [N]                                          | 30             | 30               | 30                 | 60               | 14                 | 16               | 26                 | 4                |
| Vancouver [N]                                      | 33             | 30               | 33                 | 63               | 18                 | 12               | 16                 | 17               |
| Handedness (right / ambidextrous / left) [N]       | 109 / 2 / 12   | 106 / 3 / 11     | 104 / 6 / 13       | 210 / 9 / 24     | 55 / 1 / 6         | 51 / 2 / 5       | 65 / 2 / 10        | 39 / 4 / 3       |
| <b>Number of Nonmissing Values by Variable [N]</b> |                |                  |                    |                  |                    |                  |                    |                  |
| IPI (ST)                                           | 120            | 117              | 117                | 234              | 59                 | 58               | 73                 | 44               |
| IOI (ST)                                           | 120            | 117              | 117                | 234              | 59                 | 58               | 73                 | 44               |
| ITI (ST)                                           | 120            | 117              | 117                | 234              | 59                 | 58               | 73                 | 44               |
| TD (ST)                                            | 120            | 117              | 117                | 234              | 59                 | 58               | 73                 | 44               |
| TF (ST)                                            | 120            | 117              | 117                | 234              | 59                 | 58               | 73                 | 44               |
| Freq (ST)                                          | 120            | 117              | 117                | 234              | 59                 | 58               | 73                 | 44               |
| ΔIPI (MT)                                          | 122            | 118              | 121                | 239              | 60                 | 58               | 76                 | 45               |
| ΔMTI (MT)                                          | 122            | 118              | 121                | 239              | 60                 | 58               | 76                 | 45               |
| ΔIOI (MT)                                          | 122            | 118              | 121                | 239              | 60                 | 58               | 76                 | 45               |
| ITI (MT)                                           | 121            | 118              | 121                | 239              | 60                 | 58               | 76                 | 45               |
| TD (MT)                                            | 122            | 118              | 121                | 239              | 60                 | 58               | 76                 | 45               |
| TF (MT)                                            | 122            | 118              | 121                | 239              | 60                 | 58               | 76                 | 45               |
| RT (MT)                                            | 122            | 118              | 121                | 239              | 60                 | 58               | 76                 | 45               |
| DBS <sup>1,2</sup>                                 | n/a            | 120              | 123                | 243              | n/a                | n/a              | n/a                | n/a              |
| UHDRS-TMS <sup>2</sup>                             | n/a            | 120              | 123                | 243              | n/a                | n/a              | n/a                | n/a              |
| UHDRS-fingertaps <sup>2</sup>                      | n/a            | 120              | 123                | 243              | n/a                | n/a              | n/a                | n/a              |
| VBM right-handed                                   | n/a            | 106              | 100                | 206              | n/a                | n/a              | n/a                | n/a              |
| Cortical Thickness (Siemens) right-handed          | n/a            | 50               | 43                 | 93               | n/a                | n/a              | n/a                | n/a              |
| VBM & TD                                           | n/a            | 103              | 95                 | 198              | n/a                | n/a              | n/a                | n/a              |
| VBM & IOI                                          | n/a            | 103              | 95                 | 198              | n/a                | n/a              | n/a                | n/a              |
| VBM & ΔIOI                                         | n/a            | 104              | 98                 | 202              | n/a                | n/a              | n/a                | n/a              |
| Cortical Thickness & TD                            | n/a            | 48               | 41                 | 89               | n/a                | n/a              | n/a                | n/a              |
| Cortical Thickness & IOI                           | n/a            | 49               | 43                 | 92               | n/a                | n/a              | n/a                | n/a              |
| Cortical Thickness & ΔIOI                          | n/a            | 50               | 43                 | 93               | n/a                | n/a              | n/a                | n/a              |

<sup>1</sup>[(CAG-repeat - 35.5) x age, Penney, Jr. *et al.* 1997)<sup>2</sup>for the number of correlations, please also see Table 5<sup>3</sup>only right-handed subjects were taken into account

\* 3 subjects had UHDRS- Total Motor Scores &gt; 5 but with a lower diagnostic confidence level

\*\*waivers were granted for lower Disease Burden Scores
