# Supplementary material
Source: PubMed Central journal article supplement (PMC3013584)
Supplement: supp_WNL.0b013e3182020123_table_e-2.pdf [file supp_WNL.0b013e3182020123_table_e-2.pdf]

Supplemental data table e-2

| Variable                      | Adjusted Mean        |                  |                  |                  |                  |                  |                  |                  |
|-------------------------------|----------------------|------------------|------------------|------------------|------------------|------------------|------------------|------------------|
|                               | (LowerCL to UpperCL) |                  |                  |                  |                  |                  |                  |                  |
|                               | group                |                  |                  | subgroup         |                  |                  |                  |                  |
| Unit                          | Control              | PreHD            | HD               | Control          | PreHD-A          | preHD-B          | HD1              | HD2              |
| <b>Speeded Tapping (ST)</b>   |                      |                  |                  |                  |                  |                  |                  |                  |
| <b>intervals</b>              |                      |                  |                  |                  |                  |                  |                  |                  |
| <b>IPI</b>                    | -3.6                 | -3.14            | -2.35            | -3.6             | -3.25            | -3.04            | -2.42            | -2.21            |
| log SD [s]                    | (-3.69 to -3.51)     | (-3.24 to -3.05) | (-2.44 to -2.25) | (-3.69 to -3.51) | (-3.38 to -3.11) | (-3.18 to -2.91) | (-2.54 to -2.3)  | (-2.37 to -2.06) |
| <b>ITI</b>                    | -3.78                | -3.32            | -2.61            | -3.78            | -3.41            | -3.23            | -2.64            | -2.55            |
| log SD [s]                    | (-3.87 to -3.69)     | (-3.41 to -3.23) | (-2.7 to -2.52)  | (-3.87 to -3.69) | (-3.54 to -3.28) | (-3.36 to -3.1)  | (-2.76 to -2.53) | (-2.7 to -2.39)  |
| <b>IOI</b>                    | -3.55                | -3.1             | -2.3             | -3.55            | -3.2             | -3               | -2.38            | -2.17            |
| log SD [s]                    | (-3.64 to -3.46)     | (-3.2 to -3)     | (-2.4 to -2.21)  | (-3.64 to -3.46) | (-3.33 to -3.07) | (-3.14 to -2.87) | (-2.49 to -2.26) | (-2.33 to -2.02) |
| <b>TD</b>                     | -3.97                | -3.63            | -2.76            | -3.98            | -3.74            | -3.53            | -2.88            | -2.54            |
| log SD [s]                    | (-4.07 to -3.88)     | (-3.73 to -3.53) | (-2.86 to -2.66) | (-4.07 to -3.88) | (-3.87 to -3.61) | (-3.66 to -3.39) | (-3 to -2.76)    | (-2.7 to -2.38)  |
| <b>additional variables</b>   |                      |                  |                  |                  |                  |                  |                  |                  |
| <b>TF</b>                     | 33.63                | 38.77            | 46.29            | 33.6             | 37.49            | 39.96            | 45.11            | 48.38            |
| CoV [%]                       | (31.75 to 35.5)      | (36.82 to 40.72) | (44.34 to 48.23) | (31.74 to 35.47) | (34.8 to 40.19)  | (37.23 to 42.68) | (42.68 to 47.54) | (45.16 to 51.59) |
| <b>Freq</b>                   | 4.73                 | 4.53             | 3.24             | 4.73             | 4.63             | 4.44             | 3.33             | 3.07             |
| [Hz]                          | (4.6 to 4.86)        | (4.39 to 4.66)   | (3.1 to 3.37)    | (4.61 to 4.86)   | (4.44 to 4.82)   | (4.25 to 4.62)   | (3.16 to 3.5)    | (2.85 to 3.29)   |
| <b>Metronome Tapping (MT)</b> |                      |                  |                  |                  |                  |                  |                  |                  |
| <b>intervals</b>              |                      |                  |                  |                  |                  |                  |                  |                  |
| <b>ΔIPI</b>                   | -3.39                | -3.13            | -2.39            | -3.39            | -3.24            | -3.03            | -2.55            | -2.1             |
| log SD [s]                    | (-3.47 to -3.3)      | (-3.22 to -3.04) | (-2.48 to -2.3)  | (-3.47 to -3.3)  | (-3.36 to -3.12) | (-3.15 to -2.9)  | (-2.66 to -2.45) | (-2.24 to -1.96) |
| <b>ΔMTI</b>                   | -3.7                 | -3.44            | -2.57            | -3.7             | -3.6             | -3.3             | -2.73            | -2.27            |
| log SD [s]                    | (-3.79 to -3.61)     | (-3.53 to -3.35) | (-2.66 to -2.48) | (-3.78 to -3.62) | (-3.68 to -3.51) | (-3.41 to -3.19) | (-2.87 to -2.6)  | (-2.46 to -2.08) |
| <b>ΔIOI</b>                   | -3.61                | -3.34            | -2.47            | -3.61            | -3.49            | -3.19            | -2.64            | -2.17            |
| log SD [s]                    | (-3.7 to -3.52)      | (-3.43 to -3.24) | (-2.57 to -2.38) | (-3.69 to -3.54) | (-3.58 to -3.41) | (-3.3 to -3.09)  | (-2.77 to -2.5)  | (-2.37 to -1.96) |
| <b>ITI</b>                    | -3.49                | -3.28            | -2.56            | -3.49            | -3.41            | -3.14            | -2.66            | -2.37            |
| log SD [s]                    | (-3.57 to -3.41)     | (-3.35 to -3.2)  | (-2.64 to -2.48) | (-3.56 to -3.42) | (-3.47 to -3.35) | (-3.23 to -3.05) | (-2.78 to -2.55) | (-2.54 to -2.2)  |
| <b>TD</b>                     | -3.82                | -3.51            | -2.89            | -3.82            | -3.59            | -3.46            | -3.06            | -2.58            |
| log SD [s]                    | (-3.9 to -3.73)      | (-3.6 to -3.42)  | (-2.98 to -2.8)  | (-3.88 to -3.75) | (-3.68 to -3.5)  | (-3.57 to -3.35) | (-3.18 to -2.93) | (-2.79 to -2.37) |
| <b>additional variables</b>   |                      |                  |                  |                  |                  |                  |                  |                  |
| <b>TF</b>                     | 16.99                | 20.64            | 29.59            | 16.98            | 20.26            | 20.84            | 27.57            | 33.22            |
| CoV [%]                       | (15.73 to 18.26)     | (19.32 to 21.96) | (28.3 to 30.89)  | (15.75 to 18.21) | (18.49 to 22.04) | (19.02 to 22.66) | (25.99 to 29.14) | (31.11 to 35.32) |
| <b>RT</b>                     | 0.64                 | 0.75             | 0.82             | 0.64             | 0.76             | 0.74             | 0.81             | 0.83             |
| [s]                           | (0.57 to 0.71)       | (0.67 to 0.82)   | (0.74 to 0.89)   | (0.57 to 0.71)   | (0.66 to 0.86)   | (0.63 to 0.84)   | (0.72 to 0.9)    | (0.71 to 0.95)   |
