# Supplementary material
Source: PubMed Central journal article supplement (PMC3013584)

# VBM Grey Matter

# VBM White Matter

TD (ST)

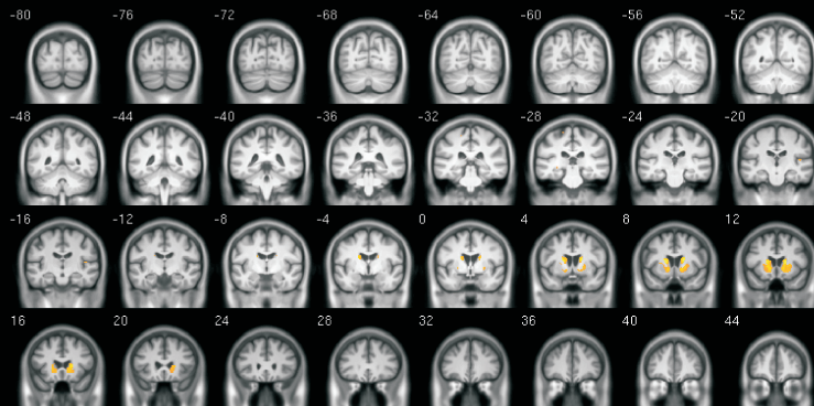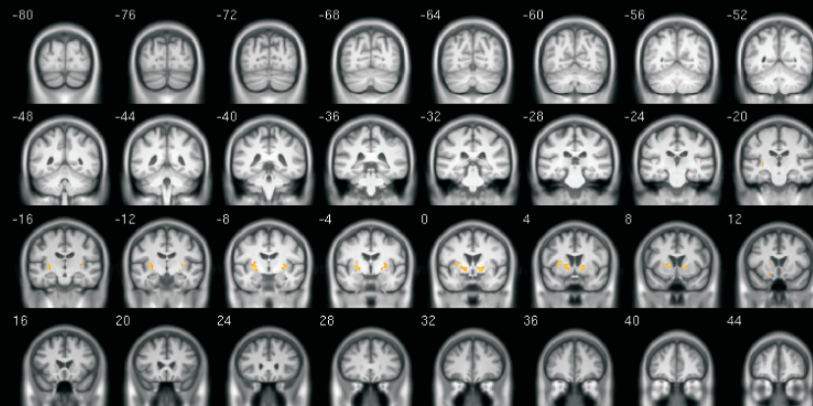

IOI (ST)

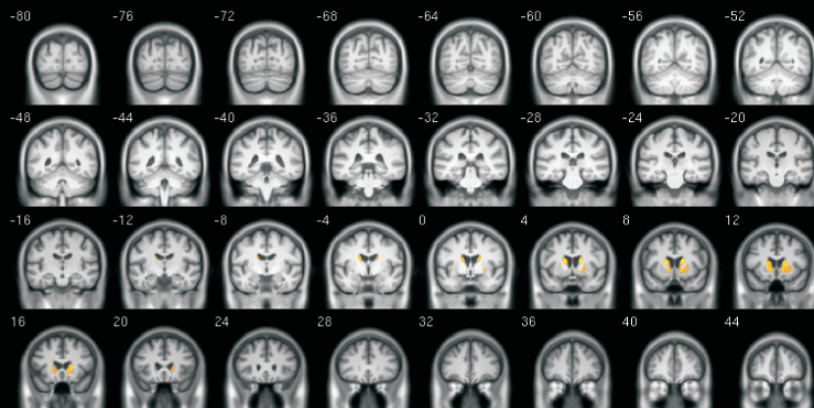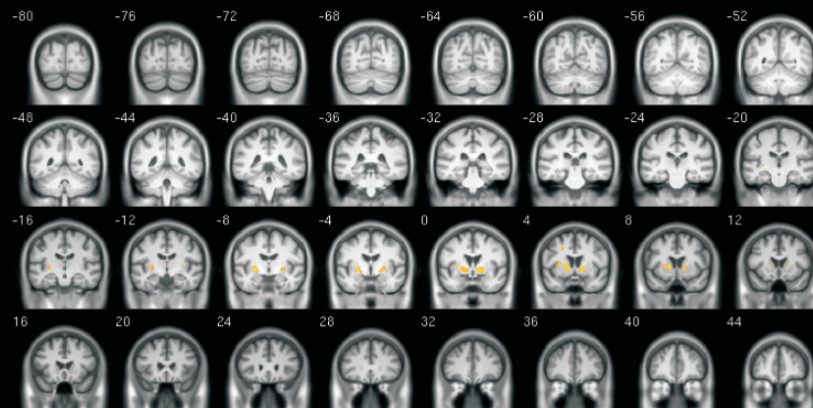

$\Delta$ IOI (MT)

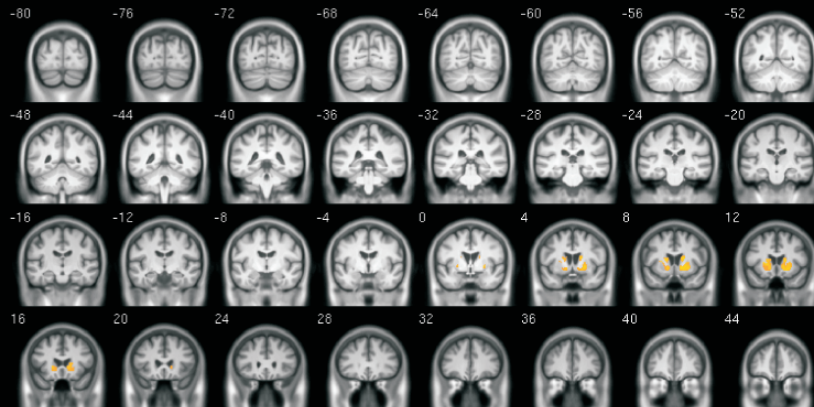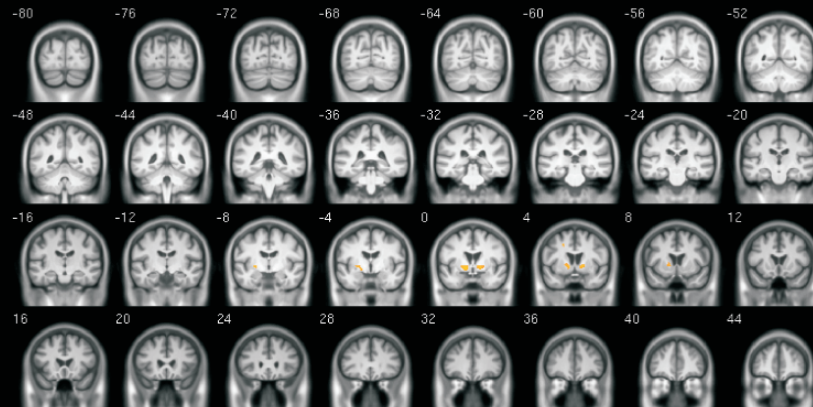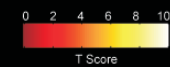

Supplement: supp_WNL.0b013e3182020123_figure_e-1.pdf [file supp_WNL.0b013e3182020123_figure_e-1.pdf]
